# Supplementary material for: Antimicrobial and Flame-Retardant Coatings Prepared from Nano- and Microparticles of Unmodified and Nitrogen-Modified Polyphenols
Source: MDPI journal article supplement (doi:10.3390/polym15040992), 2023-02-16
Supplement: s1 [file s1]

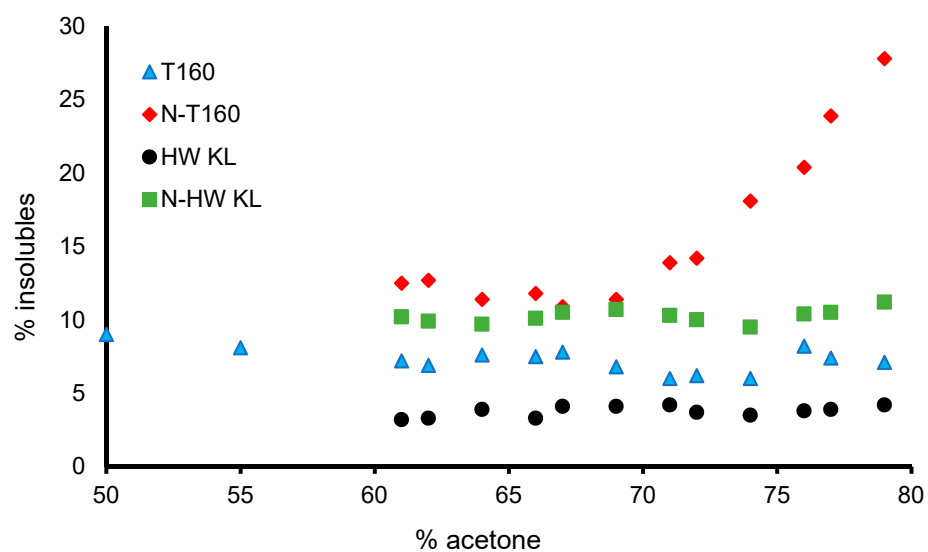

**Figure S1.** Solubility of tannins and lignins in aqueous acetone. T160 = spruce tannin alkali-extracted at 160°C, N-T160 = nitrogen-modified T160, HW KL = hardwood kraft lignin, N-HW KL = nitrogen-modified HW KL.
